# Supplementary material for: Out-of-Pocket Costs Among Patients With a New Cancer Diagnosis Enrolled in High-Deductible Health Plans vs Traditional Insurance
Source: PubMed Central journal article supplement (PMC8696568; doi:10.1001/jamanetworkopen.2021.34282), 2021-12-22
Supplement: jamanetwopen-e2134282-s001.pdf [file jamanetwopen-e2134282-s001.pdf]

## Supplementary Online Content

Fu SJ, Rose L, Dawes AJ, Knowlton LM, Ruddy KJ, Morris AM. Out-of-pocket costs among patients with a new cancer diagnosis enrolled in high-deductible health plans vs traditional insurance. *JAMA Netw Open*. 2021;4(12):e2134282.

doi:10.1001/jamanetworkopen.2021.34282

**eTable 1.** *ICD-9* and *ICD-10* Cancer Codes

**eTable 2.** Baseline Characteristics of Pre- and Post-Matched Cancer and Control Cohorts

**eFigure 1.** Balance Tests After Propensity Score Matching

**eFigure 2.** OOPC by Cancer Type

**eFigure 3.** OOPC of HDHP vs Traditional Plan Enrollees by Cancer Type

**eTable 3.** Deductibles and Charges During the Event Year

This supplementary material has been provided by the authors to give readers additional information about their work.

**eTable 1.** *ICD-9* and *ICD-10* Cancer Codes

| Cancer type | <i>ICD-9</i>              | <i>ICD-10</i>             |
|-------------|---------------------------|---------------------------|
| Breast      | 174-175                   | C50                       |
| Colorectal  | 153-154                   | C18-C20                   |
| Lung        | 162                       | C34                       |
| Other       | 140-152; 155-161; 163-209 | C00-C17; C21-C33; C35-C7A |

**eTable 2.** Baseline Characteristics of Pre- and Post-Matched Cancer and Control Cohorts

|                          | Pre-matched                 |                                 | Post-matched                 |                               |
|--------------------------|-----------------------------|---------------------------------|------------------------------|-------------------------------|
|                          | Cancer<br>n=137,294<br>(7%) | Control<br>n=1,924,045<br>(93%) | Cancer<br>n=134,826<br>(50%) | Control<br>n=134,826<br>(50%) |
| Age, median (IQR)        | 53<br>(45-58)               | 42<br>(31-52)                   | 53<br>(46-58)                | 53<br>(46-59)                 |
| CCI, median (IQR)        | 2<br>(1-3)                  | 0<br>(0-1)                      | 2<br>(1-3)                   | 3<br>(1-3)                    |
| Sex, n (%)               |                             |                                 |                              |                               |
| Female                   | 76,015<br>(55%)             | 1,064,918<br>(55%)              | 73,572<br>(55%)              | 66,619<br>(49%)               |
| Male                     | 61,279<br>(45%)             | 859,127<br>(45%)                | 61,254<br>(45%)              | 68,207<br>(51%)               |
| Race/ethnicity, n (%)    |                             |                                 |                              |                               |
| NHW                      | 112,107<br>(82%)            | 1,376,858<br>(72%)              | 110,071<br>(81%)             | 105,023<br>(78%)              |
| Black                    | 9,994<br>(7%)               | 194,209<br>(10%)                | 9,963<br>(7%)                | 13,298<br>(10%)               |
| Hispanic                 | 11,304<br>(8%)              | 249,463<br>(13%)                | 11,077<br>(8%)               | 12,499<br>(9%)                |
| Asian                    | 3,889<br>(3%)               | 103,515<br>(5%)                 | 3,715<br>(3%)                | 4,006<br>(3%)                 |
| Insurance Product, n (%) |                             |                                 |                              |                               |
| HMO                      | 21,515<br>(16%)             | 261,793<br>(14%)                | 21,245<br>(16%)              | 23,548<br>(17%)               |
| POS                      | 93,021<br>(68%)             | 1,341,410<br>(70%)              | 91,027<br>(68%)              | 85,189<br>(63%)               |
| EPO                      | 14,707<br>(11%)             | 221,699<br>(12%)                | 14,524<br>(11%)              | 15,552<br>(12%)               |
| PPO                      | 6,164<br>(4%)               | 78,511<br>(4%)                  | 6,147<br>(5%)                | 7,322<br>(5%)                 |
| Indemnity                | 72<br>(0%)                  | 473<br>(0%)                     | 72<br>(0%)                   | 111<br>(0%)                   |
| Other                    | 1,815<br>(1%)               | 20,159<br>(1%)                  | 1,811<br>(1%)                | 3,104<br>(2%)                 |
| HDHP, n (%)              | 67,264<br>(49%)             | 597,491<br>(31%)                | 65,377<br>(48%)              | 58,698<br>(44%)               |

Abbreviations: n=number; IQR=interquartile range; CCI=Charlson comorbidity index; NHW=non-Hispanic White; HMO=health maintenance organization; POS=point-of-service; EPO=exclusive provider organization; PPO=preferred provider organization; HDHP=high deductible health plan

**eFigure 1.** Balance Tests After Propensity Score Matching

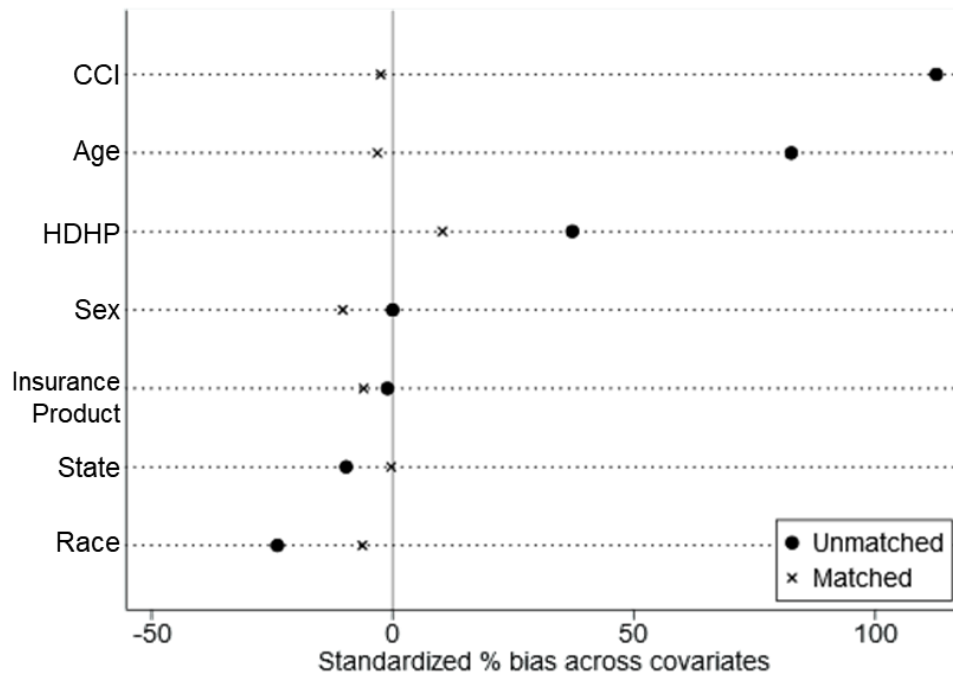

**eFigure 2. OOPC by Cancer Type**

**A. Median Monthly OOPC by cancer type relative to event**

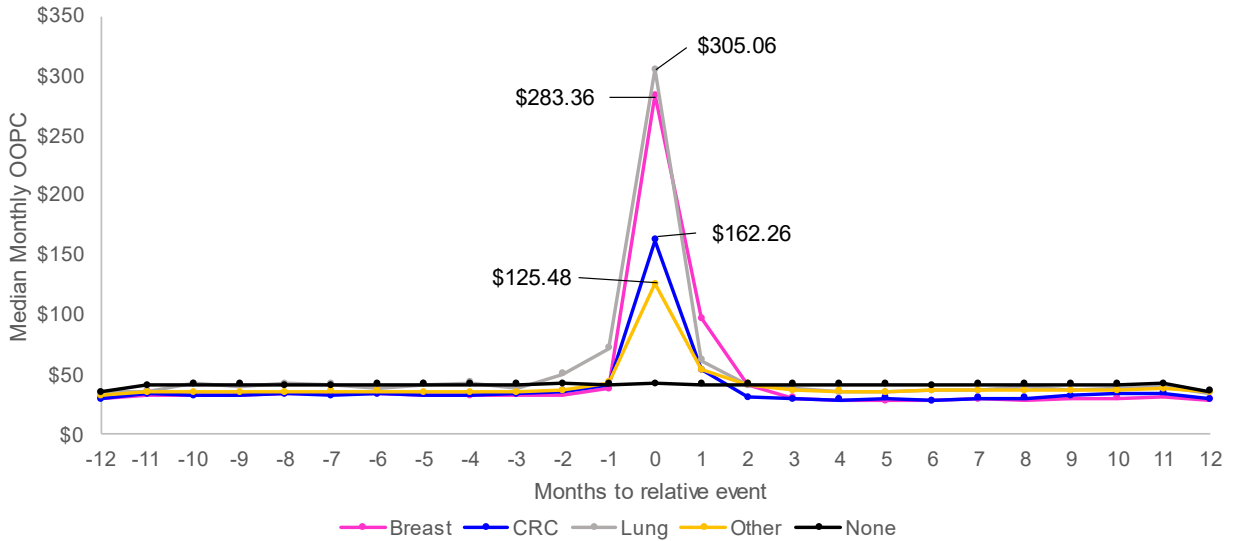

**B. Median Yearly OOPC by cancer type relative to event**

| Median yearly OOPC (IQR) | Pre-event                        | Post-event                         | Difference                        |
|--------------------------|----------------------------------|------------------------------------|-----------------------------------|
| Breast                   | \$477.71<br>(\$108.20 -1,435.90) | \$1,823.59<br>(\$419.96 -4,125.66) | \$705.42<br>(\$0 -3,027.19)       |
| Colorectal               | \$365.20<br>(\$81.45 -1,282.75)  | \$1,193.85<br>(\$248.95 -3,346.63) | \$330.13<br>(-25.53 -2,246.54)    |
| Lung                     | \$885.94<br>(\$229.00 -2,324.71) | \$1,649.16<br>(\$473.99 -3,399.16) | \$271.17<br>(-\$276.19 -1,774.36) |
| Other Cancer             | \$348.89<br>(\$92.25 -1,131.91)  | \$838.55<br>(\$276.54 -1,998.87)   | \$220.34<br>(-\$66.25 -1,125.46)  |
| Control                  | \$534.64<br>(\$159.70 -1,501.15) | \$682.62<br>(\$198.60 -1,819.50)   | \$21.60<br>(-\$363.97 -712.05)    |

\*Comparison of yearly median OOPC difference amongst cancer type

Abbreviations: OOPC=out-of-pocket costs; IQR=interquartile range; HDHP=high-deductible health plan

**eFigure 3. OOPC of HDHP vs Traditional Plan Enrollees by Cancer Type**

A. Median monthly OOPC of HDHP vs traditional plan enrollees by cancer type

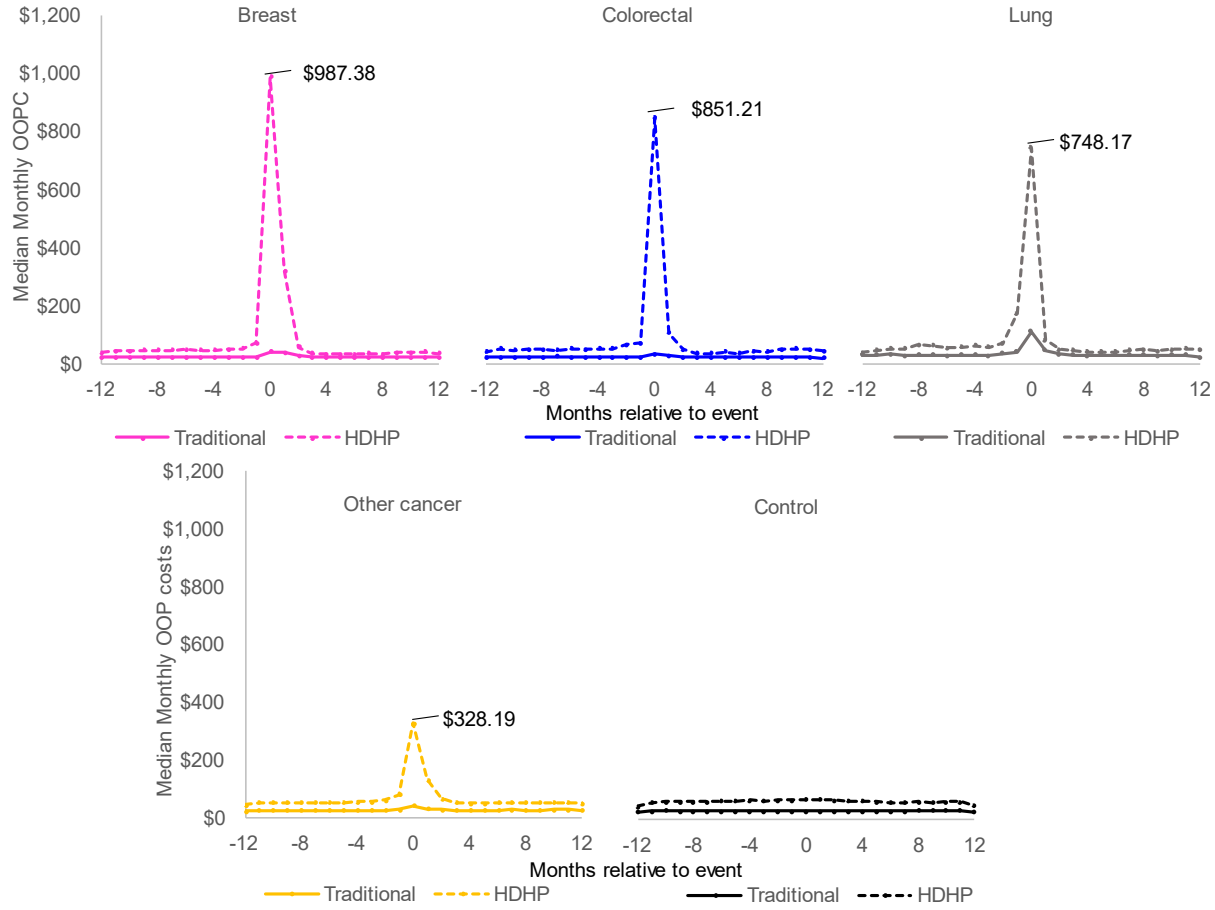

B. Median Yearly OOPC of HDHP vs traditional plan enrollees by cancer type

| Median Yearly OOPC (IQR) | Pre-event                         |                                     | Post-event                        |                                       | Difference                          |                                     |
|--------------------------|-----------------------------------|-------------------------------------|-----------------------------------|---------------------------------------|-------------------------------------|-------------------------------------|
|                          | Traditional                       | HDHP                                | Traditional                       | HDHP                                  | Traditional                         | HDHP                                |
| Breast                   | \$180.00<br>(\$33.60-604.26)      | \$1,023.49<br>(\$355.69 - 2,218.74) | \$542.96<br>(\$107.70 - 1,936.78) | \$3,406.85<br>(\$1,673.59- 5,760.61)  | \$160.00<br>(\$0-1,250.16)          | \$1,975.99<br>(\$155.03 - 4,508.38) |
| CRC                      | \$150.82<br>(\$23.80-538.41)      | \$897.71<br>(\$252.76 - 2,220.14)   | \$349.04<br>(\$74.55- 1,250.52)   | \$2,815.79<br>(\$1,277.81- 5,003.11)  | \$65.54<br>(-\$14.63-698.81)        | \$1,452.14<br>(-\$93.34 - 3,900.41) |
| Lung                     | \$413.13<br>(\$102.08 - 1,254.80) | \$1,737.22<br>(\$725.73 - 3,264.17) | \$782.60<br>(\$205.36- 2,257.93)  | \$2,568.76<br>(\$1,282.30 - 4,518.74) | \$133.02<br>(-\$67.26 - \$1,055.20) | \$644.99<br>(-\$786.23 - 2,644.62)  |
| Other cancer             | \$170.01<br>(\$47.20-502.54)      | \$754.25<br>(\$248.50 - 1,935.75)   | \$347.28<br>(\$125.27 -843.84)    | \$1,670.34<br>(\$887.42 - 3,003.66)   | \$81.20<br>(-\$33.50-433.26)        | \$732.37<br>(-\$210.66 - 1,938.67)  |
| Control                  | \$270.98<br>(\$78.90-746.74)      | \$1,161.35<br>(\$478.50 - 2,456.24) | \$342.51<br>(\$97.94 -982.96)     | \$1,372.99<br>(\$595.33 - 2,793.19)   | \$5.55<br>(-\$168.6-376.92)         | \$103.84<br>(-\$846.77 - 1,293.97)  |

Abbreviations: OOPC=out-of-pocket costs; IQR=interquartile range; CRC=colorectal; HDHP=high-deductible health plan

**eTable 3.** Deductibles and Charges During the Event Year

|                   | All Cancers | Lung    | Breast | CRC    | Other  | No Cancer | All Cancer - HSA | No Cancer - HSA |
|-------------------|-------------|---------|--------|--------|--------|-----------|------------------|-----------------|
| <b>Deductible</b> |             |         |        |        |        |           |                  |                 |
| Average           | 5733        | 5817    | 6538   | 5763   | 5606   | 2740      | 16453            | 7743            |
| SD                | 9577        | 9693    | 10440  | 9677   | 9425   | 6647      | 13883            | 11085           |
| Median            | 1447        | 1250    | 1649   | 1238   | 1395   | 143       | 13013            | 2486            |
|                   |             |         |        |        |        |           |                  |                 |
| <b>Charges</b>    |             |         |        |        |        |           |                  |                 |
| Average           | 237176      | 542880  | 477434 | 426158 | 187000 | 77078     |                  |                 |
| SD                | 686768      | 1261800 | 878016 | 904562 | 61435  | 364990    |                  |                 |
| Median            | 43200       | 148728  | 158818 | 99539  | 35093  | 6567      |                  |                 |

CRC: Colorectal Cancer; HSA: Health Savings Account; SD: standard deviation.
